# Supplementary material for: Stable-radicals increase the conductance and Seebeck coefficient of graphene nanoconstrictions
Source: Royal Society of Chemistry journal article supplement (doi:10.1039/c8nr04869j), 2018-01-01
Supplement: c8nr04869j1.pdf [file c8nr04869j1.pdf]

## Supporting information

### Stable-radicals increase the conductance and Seebeck coefficient of graphene nanoconstrictions

Mohammed Noori<sup>1,2</sup>, Hatef Sadeghi<sup>1,\*</sup> and Colin J. Lambert<sup>1</sup>

<sup>1</sup>The Theory of Molecular-scale Transport, Department of Physics, Lancaster University, Lancaster, UK

<sup>2</sup>Department of Physics, College of Science, University of Thi-Qar, IRAQ

\**h.sadeghi@lancaster.ac.uk*; *c.lambert@lancaster.ac.uk*

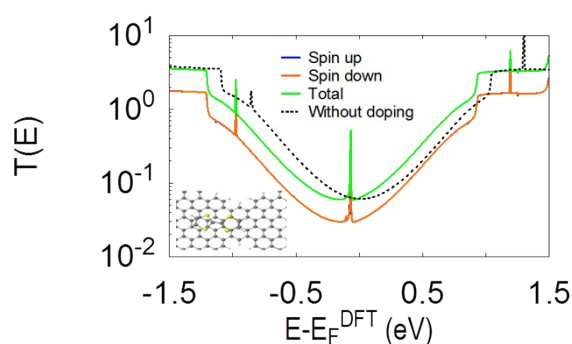

Figure S1. The spin-dependent and total transmission coefficient as a function of energy for TTF nanoconstriction junction

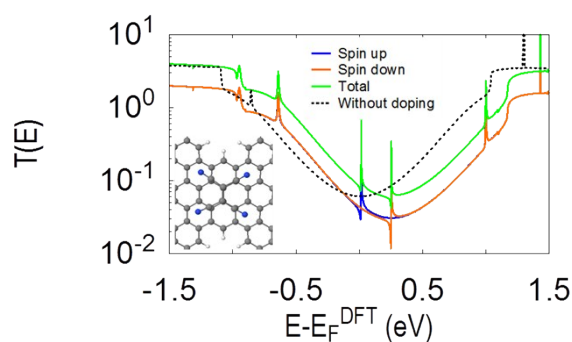

Figure S2. The spin-dependent and total transmission coefficient as a function of energy for TCNE nanoconstriction junction

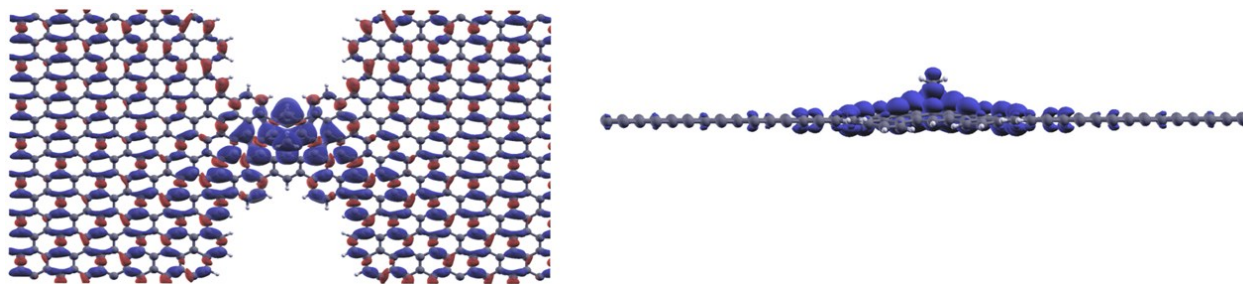

Figure S3. Local density of states ( LDOS) of the graphene nanoconstrictions in the presence of 4-picoline radical. The LDOS is calculated by integrating the imaginary of the Green's function  $G(r,E)$  with respect to energy  $E$  over a small energy window centered of a given atom.
